# Supplementary material for: Association of Neighborhood Measures of Social Determinants of Health With Breast, Cervical, and Colorectal Cancer Screening Rates in the US Midwest
Source: PubMed Central journal article supplement (PMC7063513; doi:10.1001/jamanetworkopen.2020.0618), 2020-03-09
Supplement: jamanetwopen-3-e200618-s001.pdf [file jamanetwopen-3-e200618-s001.pdf]

## Supplementary Online Content

Kurani SS, McCoy RG, Lampman MA, et al. Association of neighborhood measures of social determinants of health with breast, cervical, and colorectal cancer screening rates in the US Midwest. *JAMA Netw Open*. 2020;3(3):e200618. doi:10.1001/jamanetworkopen.2020.0618

**eTable.** American Community Survey 5-Year Estimates and Factor Score Coefficients

**eFigure.** Adjusted Percentage of Cancer Screening Completion Rates Among Primary Care Patients in Minnesota, Iowa, and Wisconsin

This supplementary material has been provided by the authors to give readers additional information about their work.

**eTable.** American Community Survey 5-Year Estimates and Factor Score Coefficients

| US Census Indicator                                       | 2012-2016 ACS Table Reference, 5-year estimates | Factor Score Coefficient 2016 |
|-----------------------------------------------------------|-------------------------------------------------|-------------------------------|
| Median family income                                      | B19013                                          | -0.21740                      |
| Income disparity                                          | B19001                                          | 0.05598                       |
| Families below poverty level                              | B17010                                          | 0.11151                       |
| % population below 150% poverty threshold                 | C17002                                          | 0.22992                       |
| Single parent household with dependents <18               | B23008                                          | 0.04159                       |
| Households without a motor vehicle                        | B25044                                          | 0.04491                       |
| Households without a telephone                            | B25043                                          | 0.01567                       |
| Occupied housing units without complete plumbing          | B25016                                          | 0.01140                       |
| Owner occupied housing units                              | B25003                                          | -0.05758                      |
| Households with >1 person per room                        | B25014                                          | 0.01835                       |
| Median monthly mortgage                                   | B25088                                          | -0.10626                      |
| Median gross rent                                         | B25064                                          | -0.04952                      |
| Median home value                                         | B25077                                          | -0.08486                      |
| Employed persons ≥16 in white collar occupation           | C24010                                          | -0.05700                      |
| Civilian labor force unemployed (aged ≥16)                | B23025                                          | 0.02541                       |
| Population aged ≥25 with <9yr education                   | B15003                                          | 0.06044                       |
| Population aged ≥25 with at least a high school education | B15003                                          | -0.19303                      |

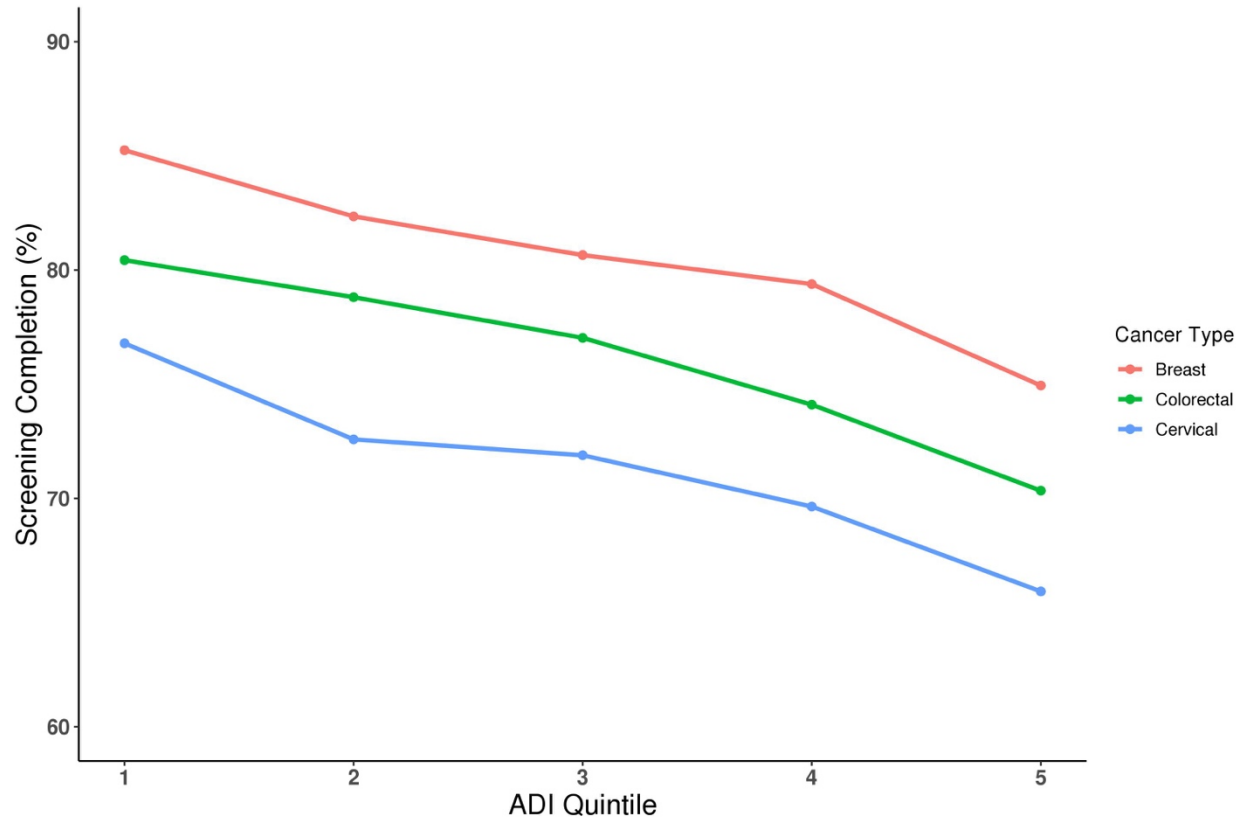

**eFigure.** Adjusted Percentage of Cancer Screening Completion Rates Among Primary Care Patients in Minnesota, Iowa, and Wisconsin  
 Adjusted for rural status, Charlson Comorbidity Index, race/ethnicity, sex (colorectal cancer only), and age.
